# Supplementary material for: Persistent Increase of Sympathetic Activity in Post-Acute COVID-19 of Paucisymptomatic Healthcare Workers
Source: MDPI journal article supplement (doi:10.3390/ijerph20010830), 2023-01-01
Supplement: s1 [file s1]

# Supplementary Materials

**Table S1.** Correlations between cardiac parameters and duration of the disease's acute phase.

| Variables    | Pearson Correlation | p-Value |
|--------------|---------------------|---------|
| nLF          | 0.04                | 0.80    |
| nHF          | -0.04               | 0.80    |
| LF/HF        | -0.02               | 0.87    |
| SDNN         | -0.02               | 0.88    |
| RMSSD        | -0.03               | 0.84    |
| Mean HR, bpm | 0.01                | 0.43    |

**Table S2.** Correlations between cardiac parameters and elapsed time from COVID-19 to ECG-test.

| Variables    | Pearson Correlation | p-Value |
|--------------|---------------------|---------|
| nLF          | 0.07                | 0.64    |
| nHF          | -0.07               | 0.64    |
| LF/HF        | -0.08               | 0.61    |
| SDNN         | -0.17               | 0.25    |
| RMSSD        | -0.11               | 0.49    |
| Mean HR, bpm | 0.02                | 0.91    |

**Table S3.** Subgroup analysis in recovered COVID-19 HCWs: cardiac parameters among males and females.

| Variables          | Male, <i>n</i> = 12 | Female, <i>n</i> = 32 | <i>p</i> -Value |
|--------------------|---------------------|-----------------------|-----------------|
| nLF                | 55.2 ± 16.6         | 53.0 ± 21.1           | 0.78            |
| nHF                | 44.8 ± 16.6         | 47 ± 21.0             | 0.78            |
| LF/HF              | 1.57 ± 1.04         | 1.69 ± 1.48           | 0.78            |
| SDNN <sup>a</sup>  | 1.34 (1.21–1.56)    | 1.39 (1.22–1.50)      | 0.88            |
| RMSSD <sup>a</sup> | 1.33 (1.06–1.50)    | 1.33 (1.15–1.47)      | 0.98            |
| Mean HR, bpm       | 74 ± 10.8           | 73.9 ± 7.93           | 1.00            |

Values are given as mean ± standard deviation and median (IQR 25–75). Mann-Whitney U-test was used between males vs females. <sup>a</sup> Log transformed values.

**Table S4.** Subgroup analysis in recovered COVID-19 HCWs: cardiac parameters among subjects with and without cardiac symptoms and with and without palpitations during the acute phase of infection.

| Variables          | Subjects with Cardiac Symptoms, <i>n</i> = 22 | Subjects without Cardiac Symptoms, <i>n</i> = 22 | <i>p</i> -Value |
|--------------------|-----------------------------------------------|--------------------------------------------------|-----------------|
| nLF                | 54.1 ± 19.8                                   | 53.0 ± 20.3                                      | 0.89            |
| nHF                | 45.8 ± 19.8                                   | 47.0 ± 20.3                                      | 0.88            |
| LF/HF              | 1.72 ± 1.48                                   | 1.60 ± 1.28                                      | 0.87            |
| SDNN <sup>a</sup>  | 1.34 (1.21–1.47)                              | 1.42 (1.24–1.58)                                 | 0.23            |
| RMSSD <sup>a</sup> | 1.34 (1.09–1.44)                              | 1.32 (1.15–1.53)                                 | 0.50            |
| Mean HR, bpm       | 73.0 ± 6.97                                   | 74.7 ± 10.2                                      | 0.58            |

  

| Variables          | Subjects with Palpitations, <i>n</i> = 13 | Subjects without Palpitations, <i>n</i> = 31 | <i>p</i> -Value |
|--------------------|-------------------------------------------|----------------------------------------------|-----------------|
| nLF                | 51.5 ± 20.6                               | 54.5 ± 19.8                                  | 0.63            |
| nHF                | 48.4 ± 20.6                               | 45.5 ± 19.8                                  | 0.64            |
| LF/HF              | 1.49 ± 1.16                               | 1.73 ± 1.46                                  | 0.64            |
| SDNN <sup>a</sup>  | 1.42 (1.22–1.52)                          | 1.35 (1.21–1.49)                             | 0.64            |
| RMSSD <sup>a</sup> | 1.40 (1.15–1.55)                          | 1.29 (1.14–1.49)                             | 0.47            |
| Mean HR, bpm       | 74.4 ± 7.33                               | 73.7 ± 9.27                                  | 0.78            |

Values are given as mean  $\pm$  standard deviation and median (IQR 25–75). Mann-Whitney U-test was used between subjects with cardiac symptoms vs subjects without cardiac symptoms during the acute phase of infection. <sup>a</sup> Log transformed values.

**Table S5.** Subgroup analysis in recovered COVID-19 HCWs: cardiac parameters among night shift and workers.

| Variables          | Night Shift Workers, <i>n</i> = 20 | Daytime Workers, <i>n</i> = 24 | <i>p</i> -Value |
|--------------------|------------------------------------|--------------------------------|-----------------|
| nLF                | 53.2 $\pm$ 18.7                    | 53.9 $\pm$ 21.1                | 0.90            |
| nHF                | 46.7 $\pm$ 18.7                    | 46.0 $\pm$ 21.0                | 0.90            |
| LF/HF              | 1.58 $\pm$ 1.27                    | 1.72 $\pm$ 1.47                | 0.90            |
| SDNN <sup>a</sup>  | 1.43 (1.29–1.52)                   | 1.31 (1.17–1.48)               | 0.19            |
| RMSSD <sup>a</sup> | 1.35 (1.21–1.47)                   | 1.27 (1.08–1.49)               | 0.35            |
| Mean HR, bpm       | 74.9 $\pm$ 9.27                    | 73.0 $\pm$ 8.24                | 0.76            |

Values are given as mean  $\pm$  standard deviation and median (IQR 25–75). Mann-Whitney U-test was used between night shift vs daytime workers. <sup>a</sup> Log transformed values.

**Table S6.** Subgroup analysis in recovered COVID-19 HCWs: cardiac parameters among vaccinated and non-vaccinated.

| Variables          | Vaccinated, <i>n</i> = 21 | Non-Vaccinated, <i>n</i> = 23 | <i>p</i> -Value |
|--------------------|---------------------------|-------------------------------|-----------------|
| nLF                | 49.5 $\pm$ 19.9           | 57.3 $\pm$ 19.4               | 0.21            |
| nHF                | 50.4 $\pm$ 19.9           | 42.7 $\pm$ 19.4               | 0.21            |
| LF/HF              | 1.37 $\pm$ 1.07           | 1.92 $\pm$ 1.56               | 0.20            |
| SDNN <sup>a</sup>  | 1.42 (1.22–1.56)          | 1.34 (1.19–1.47)              | 0.22            |
| RMSSD <sup>a</sup> | 1.39 (1.19–1.55)          | 1.26 (1.08–1.38)              | 0.06            |
| Mean HR, bpm       | 72.7 $\pm$ 6.87           | 75.0 $\pm$ 10.0               | 0.40            |

Values are given as mean  $\pm$  standard deviation and median (IQR 25–75). Mann-Whitney U-test was used between vaccinated vs non-vaccinated. <sup>a</sup> Log transformed values.

**Table S7.** Multiple regression analysis (model a) of the influence of SARS-COV-2 infection, age, sex, elapsed time from COVID-19 to ECG test, vaccination status, night work, body mass index, systolic blood pressure and palpitations on LF/HF.

| Variables                              | B      | R     | t     | <i>p</i> -Value |
|----------------------------------------|--------|-------|-------|-----------------|
| SARS-COV-2 infection                   | 0.72   | 0.24  | 2.15  | <b>0.03</b>     |
| Age                                    | 0.03   | 0.27  | 2.51  | <b>0.01</b>     |
| Sex                                    | 0.05   | 0.02  | 0.17  | 0.87            |
| Elapsed time from COVID-19 to ECG test | –0.003 | –0.06 | –0.52 | 0.61            |
| Vaccination status                     | –0.14  | –0.15 | –1.38 | 0.17            |
| Night work                             | 0.05   | 0.02  | 0.19  | 0.84            |
| Body mass index                        | –0.004 | –0.01 | –0.11 | 0.91            |
| Systolic blood pressure                | 0.007  | 0.08  | 0.76  | 0.45            |
| Palpitations                           | –0.33  | –0.11 | –0.94 | 0.34            |
